# Supplementary material for: Taxifolin Alleviates Metabolic and Neurochemical Alterations in Hippocampus and Cortex of Brain of Rotenone-Toxified Rats in Vivo and Effectively Interacts with Enzymes Involve in Neurotransmission in Silico
Source: Research Square preprint supplement (doi:10.21203/rs.3.rs-514482/v1), 2021-07-13
Supplement: Supplementary file 1 [file c3677797c8a49554c3b806a7.docx]

**Supplemetary Materials**

**A. Assumption of ANOVA (Analysis of Variance)**

The main assumption of ANOVA are normality test, homogeneity of variance, and no presence of outliers. Each of these assumptions were tested using SPSS. From the result of the box-plot displayed in the analysis below (Supplementary Figure 1), it could be displayed that there is presence of outliers in the data set. Supplementary Figure 2 also show that the values of the observation also deviation from normal which indicates a problem of outliers. Also, result from the Figure 2 showed that the data is not normally distributed since the standard deviation deviated from the mean value as indicate in the Histogram plot (Supplementary Figure 3).


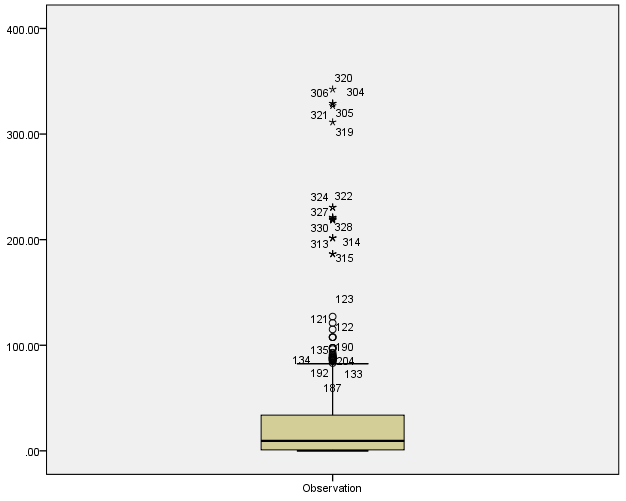


**Supplementary Figure 1** Analysis Box Plot


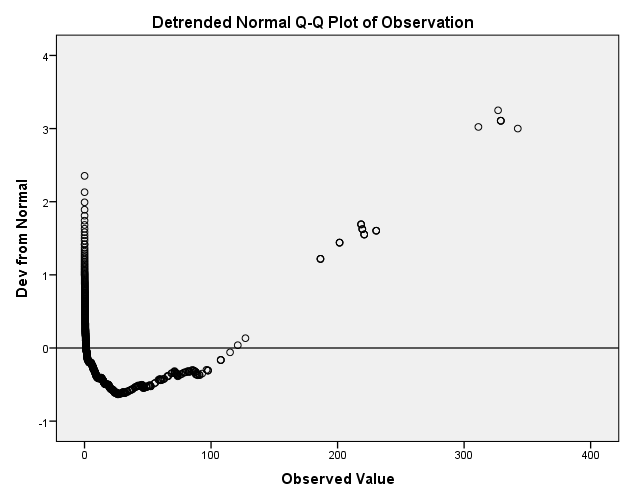
**Supplementary Figure 2** Outlier’s test


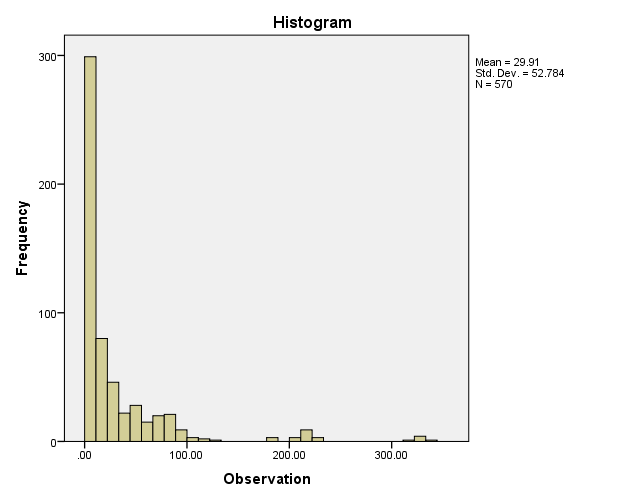


**Supplementary Figure 3** Histogram of for the experimental analysis

**B. Test of Hypothesis**

Since the assumption was not satisfied, we resulted to Kruskal–Walli’s non-parametric aspect of ANOVA using the median range. The statistical outputs showed significant different between the biochemical evaluation done on the rats’ brain homogenates. This is as a result of the p-value < 0.05, where P-value = 0.000. The null hypothesis is rejected at the decision of 95% confidence interval (Supplementary Table 1). Meanwhile, the difference between brain regions (hippocampus and cortex) was also observed in the analysis, and it was shown that there is a significant difference between the variables as displayed in Supplementary Table 2a-b of the test of statistics. It is important to note that, the data presented in the section is the test statistics outputs across all groups and the two brain regions tested for all the nineteen (19) *in vivo* experiments and not individual case processed summary. The statistics in section B of the supplementary material focused more on the differences between the outcome variables (i.e the various assays and the brain regions tested) rather than individual assays. However, the normality assessed for each outcome variables across all groups are further addressed in the next section of this supplementary material.

**Supplementary Table 1** Test Statisticsa

|  | **Observation** |
| --- | --- |
| **N** | 570 |
| **Median** | 9.4438 |
| **Chi-Square** | 474.133b |
| **Df** | 18 |
| **Asymp. Sig.** | .000 |

aGrouping Variable (*In vivo* assays)

bNo cell (0.0%) have expected frequencies less than 5. The minimum expected cell frequency is 15.0.

**Supplementary Table 2a** Frequencies

|  |  | **Brain Regions** | |
| --- | --- | --- | --- |
|  |  | **Cortex** | **Hippocampus** |
| **Observation** | > Median | 140 | 145 |
| <= Median | 145 | 140 |

**Supplementary Table 2b** Test Statisticsa

|  |  | **Observation** |
| --- | --- | --- |
| **N** |  | 570 |
| **Median** |  | 9.4438 |
| **Chi-Square** |  | .175 |
| **Df** |  | 1 |
| **Asymp. Sig.** |  | .675 |
| **Yates' Continuity Correction** | Chi-Square | .112 |
| Df | 1 |
| Asymp. Sig. | .738 |

aGrouping Variable (Brain regions)

**C. Test of Normality for Assays**

The assays from the *in vivo* experiments are tested using Kolmogrov-Smirnov tests. The normality of each of the assay as tested is sumarized in Supplementary Table 3. The result shows that assays for activities/levels of complex I, TH, MAO, Dopamine, GDH, GS, GDH, GSH, FRAP, PC, LPO, NO, and MPO are normally distributed. This proves that their P-value is less than 0.05 (5% significance level). It means that the data comes from the same distributed. When considering some of the variables which are normally distributed at P-value < 0.05, they might not be normally distributed when the p-value is considered at 10% level of significance. The assays include Complex I, MAO, Dopamine, GDH and LPO activities/levels. These variables might not come from the same distribution when considered at 10% level of significance (90% confidence interval). On the other hand, the result of Na+/K+ ATPase, LDH, AChE, GPx, SOD, CAT and XO activities are not normally distributed at P-value < 0.05. This means that these assays do not come from the same distribution since their p-value < 0.05.

**Supplementary Table 3** Statistical outputs for Tests of Normality of the *in vivo* biochemical assays

|  | Kolmogorov-Smirnovb | | |
| --- | --- | --- | --- |
| *In vivo* Assays | **Statistic** | **N** | **P value** |
| Complex I Activity | 0.152 | 30 | 0.077 |
| Na+/K+ ATPase Activity | 0.218 | 30 | 0.001 |
| Lactate Dehydrogenase Activity | 0.180 | 30 | 0.015 |
| Tyrosine Hydroxylase Activity | 0.102 | 30 | 0.200* |
| Monoamine Oxidase Activity | 0.149 | 30 | 0.087 |
| Dopamine Level | 0.093 | 30 | 0.200* |
| Acetylcholinesterase Activity | 0.205 | 30 | 0.002 |
| Glutamate Dehydrogenase Activity | 0.093 | 30 | 0.200* |
| Glutamine Synthetase Activity | 0.128 | 30 | 0.200* |
| Reduced Glutathione Level | 0.121 | 30 | 0.200* |
| Glutathione Peroxidase Activity | 0.168 | 30 | 0.030 |
| Superoxide dismutase Activity | 0.184 | 30 | 0.011 |
| Catalase Activity | 0.187 | 30 | 0.009 |
| Ferric Reducing Antioxidant Power | 0.108 | 30 | 0.200* |
| Protein Carbonyl Level | 0.077 | 30 | 0.200* |
| Extent of Lipid Peroxidation | 0.150 | 30 | 0.083 |
| Nitric Oxide Level | 0.126 | 30 | 0.200* |
| Xanthine Oxidase Activity | 0.202 | 30 | 0.003 |
| Myeloperoxidase Activity | 0.110 | 30 | 0.200* |

*This is a lower bound of the true significance.

bLilliefors Significance Correction

**D. Test of homogeneity**

Levene’s test was used to assess the homogeneity of variance. The combined statistical output for test of homogeneity is displayed in Supplementary Table 4. The explanation was based on the mean of the result due to small number of groups. Since the P values < 0.05, we rejected the Null hypothesis and concluded on the alternative. This implies that, the variance among the variables is significantly different which means that there is no equal variance among the various *in vivo* experiments. The unequal variance implicates the unsatisfactory ANOVA assumption which further supported the statistical outputs for the Kruskal–Walli non-parametric analysis of variance early presented in this supplementary note.

**Supplementary Table 4** Test of Homogeneity of Variance

|  |  | **Levene Statistic** | **Df1** | **Df2** | **Sig.** |
| --- | --- | --- | --- | --- | --- |
| Observation | Based on Mean | 27.375 | 18 | 551 | 0.000 |
| Based on Median | 22.283 | 18 | 551 | 0.000 |
| Based on Median and adjusted with df | 22.283 | 18 | 47.367 | 0.000 |
| Based on trimmed mean | 26.765 | 18 | 551 | 0.000 |
